# Supplementary material for: Angiotensin Receptor II type 1 and the activation of Myosin Light-Chain Kinase and Protein Kinase C-&beta;II. Mini Review.
Source: Preprints.org preprint supplement (doi:10.20944/preprints201912.0412.v1), 2019-12-31
Supplement: Supplementary file 1 [file supplementary]

I am submitting a follow up to the Frank-Starling paper that is written from a slightly different angle and thus contains further mechanistic considerations along with suggestions of resolution that are required. These will require efforts on others part as I no longer have research facilities but clearly require in vitro analysis of kinase specificities, including cTnI, with and without calmodulin in the absence of β-arrestin
